# Supplementary material for: Treatment-Related Adverse Events of Combination EGFR Tyrosine Kinase Inhibitor and Immune Checkpoint Inhibitor in EGFR-Mutant Advanced Non-Small Cell Lung Cancer: A Systematic Review and Meta-Analysis
Source: MDPI journal article supplement (doi:10.3390/cancers14092157), 2022-04-26
Supplement: s1 [file s1]

## **Supplementary File**

### **Treatment-related Adverse Events of Combination EGFR Tyrosine Kinase Inhibitor and Immune Checkpoint Inhibitor in EGFR-mutant Advanced Non-small Cell Lung Cancer: A Systematic Review and Meta-Analysis**

**Supplementary Figure S1.** Any-grade overall trAEs. (A) Combination therapy with epidermal growth factor tyrosine kinase inhibitor and immune checkpoint inhibitor. (B) Osimertinib monotherapy.

**Supplementary Figure S2.** Grade  $\geq 3$  overall trAEs. (A) Combination therapy with epidermal growth factor tyrosine kinase inhibitor and immune checkpoint inhibitor. (B) Osimertinib monotherapy.

**Supplementary Figure S3.** Any-grade skin trAEs. (A) Combination therapy with epidermal growth factor receptor tyrosine kinase inhibitor and immune checkpoint inhibitor. (B) Osimertinib monotherapy.

**Supplementary Figure S4.** Any-grade gastrointestinal trAEs. (A) Combination therapy with epidermal growth factor receptor tyrosine kinase inhibitor and immune checkpoint inhibitor. (B) Osimertinib monotherapy.

**Supplementary Figure S5.** Any-grade interstitial lung diseases. (A) Combination therapy with epidermal growth factor receptor tyrosine kinase inhibitor and immune checkpoint inhibitor. (B) Osimertinib monotherapy.

**Supplementary Figure S6.** Grade  $\geq 3$  skin trAEs. (A) Combination therapy with epidermal growth factor receptor tyrosine kinase inhibitor and immune checkpoint inhibitor. (B) Osimertinib monotherapy.

**Supplementary Figure S7.** Grade  $\geq 3$  gastrointestinal trAEs. (A) Combination therapy with epidermal growth factor receptor tyrosine kinase inhibitor and immune checkpoint inhibitor. (B) Osimertinib monotherapy.

**Supplementary Figure S8.** Grade  $\geq 3$  interstitial lung disease. (A) Combination therapy with epidermal growth factor receptor tyrosine kinase inhibitor and immune checkpoint inhibitor. (B) Osimertinib monotherapy.

**Supplementary Figure S9.** Sensitivity analysis on any-grade interstitial lung disease. (A) Combination therapy with epidermal growth factor receptor tyrosine kinase inhibitor and immune checkpoint inhibitor. (B) Osimertinib monotherapy, among studies with sample size  $\geq 40$ .

**Supplementary Figure S10.** Sensitivity analysis on grade  $\geq 3$  interstitial lung disease. (A) Combination therapy with epidermal growth factor receptor tyrosine kinase inhibitor and immune checkpoint inhibitor. (B) Osimertinib monotherapy, among studies with sample size  $\geq 40$ .

**Supplementary Table S1.** Summary of osimertinib monotherapy studies.

**Supplementary Table S2.** Ongoing clinical trials of immune checkpoint inhibitors (ICI) in advanced, metastatic non-small cell lung cancer.

**Supplementary Table S3.** Incidence and nature of trAEs in selected clinical studies.

**Supplementary Table S4.** The Cochrane Collaboration's tool for assessing risks of bias of randomized-controlled trials.

**Supplementary Table S5.** Newcastle-Ottawa Scale (NOS) for quality assessment of non-randomized-controlled trials.

**Supplementary Figure S1.** Any-grade overall trAEs. (A) Combination therapy with epidermal growth factor tyrosine kinase inhibitor and immune checkpoint inhibitor. (B) Osimertinib monotherapy.

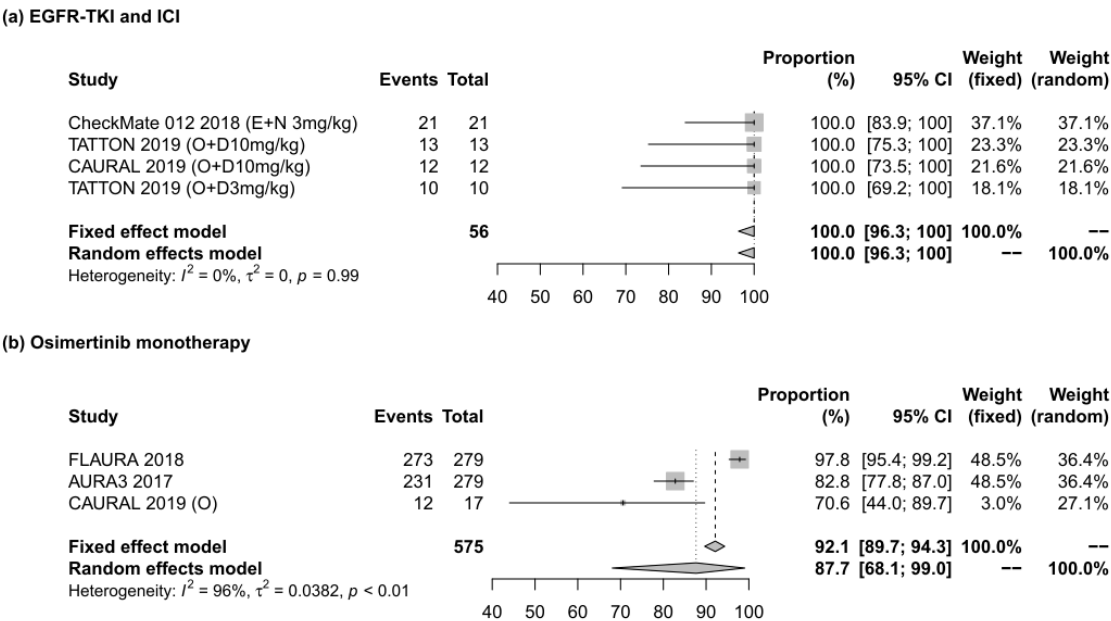

The squares represent the proportions of AE from each study, with smaller squares for larger sample size of the studies. The diamonds represent pooled proportions generated from fixed effect or random effects model. D, durvalumab; E, erlotinib; EGFR, epidermal growth factor receptor; ICI, immune checkpoint inhibitor; N, nivolumab; O, osimertinib; trAEs, treatment-related adverse events; TKI, tyrosine kinase inhibitor.

**Supplementary Figure S2.** Grade  $\geq 3$  overall trAEs. (A) Combination therapy with epidermal growth factor tyrosine kinase inhibitor and immune checkpoint inhibitor. (B) Osimertinib monotherapy.

**(A) EGFR-TKI and ICI**

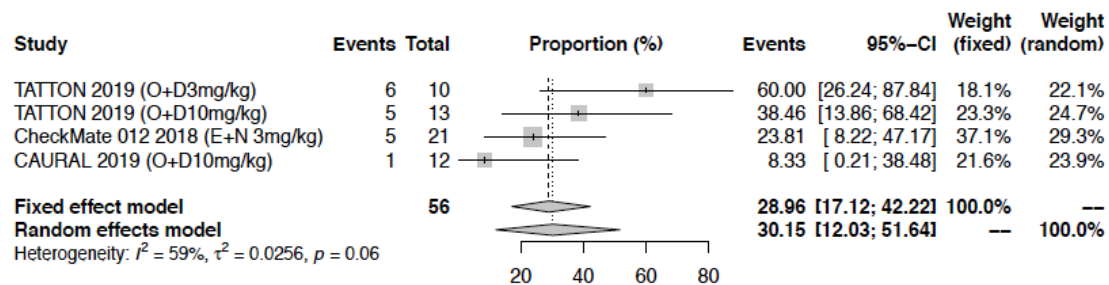

**(B) Osimertinib Monotherapy**

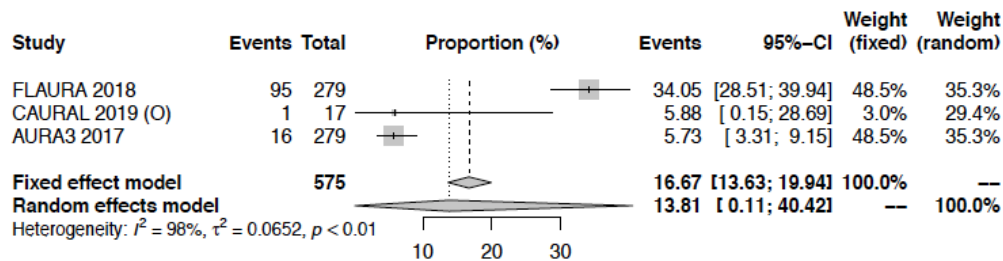

The squares represent the proportions of AE from each study, with smaller squares for larger sample size of the studies. The diamonds represent pooled proportions generated from fixed effect or random effects model. D, durvalumab; E, erlotinib; EGFR, epidermal growth factor receptor; ICI, immune checkpoint inhibitor; N, nivolumab; O, osimertinib; trAEs, treatment-related adverse events; TKI, tyrosine kinase inhibitor.

**Supplementary Figure S3.** Any-grade skin trAEs. (A) Combination therapy with epidermal growth factor receptor tyrosine kinase inhibitor and immune checkpoint inhibitor. (B) Osimertinib monotherapy.

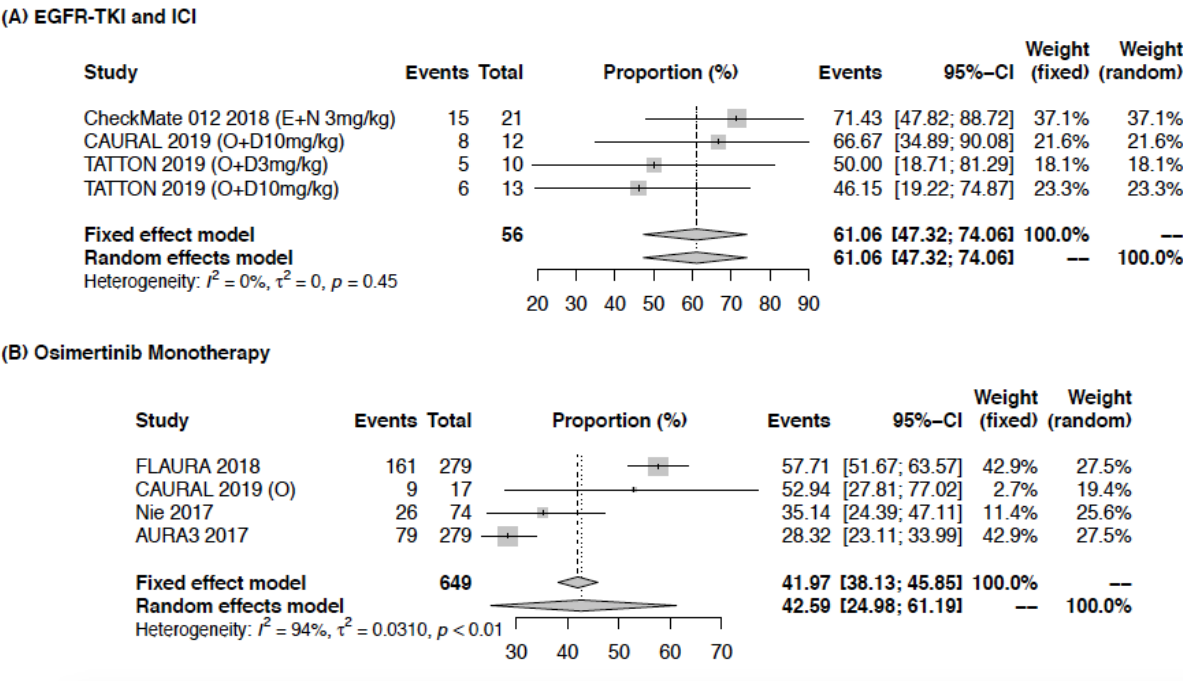

The squares represent the proportions of AE from each study, with smaller squares for larger sample size of the studies. The diamonds represent pooled proportions generated from fixed effect or random effects model. D, durvalumab; E, erlotinib; EGFR, epidermal growth factor receptor; ICI, immune checkpoint inhibitor; N, nivolumab; O, osimertinib; trAEs, treatment-related adverse events; TKI, tyrosine kinase inhibitor.

**Supplementary Figure S4.** Any-grade gastrointestinal trAEs. (A) Combination therapy with epidermal growth factor receptor tyrosine kinase inhibitor and immune checkpoint inhibitor. (B) Osimertinib monotherapy.

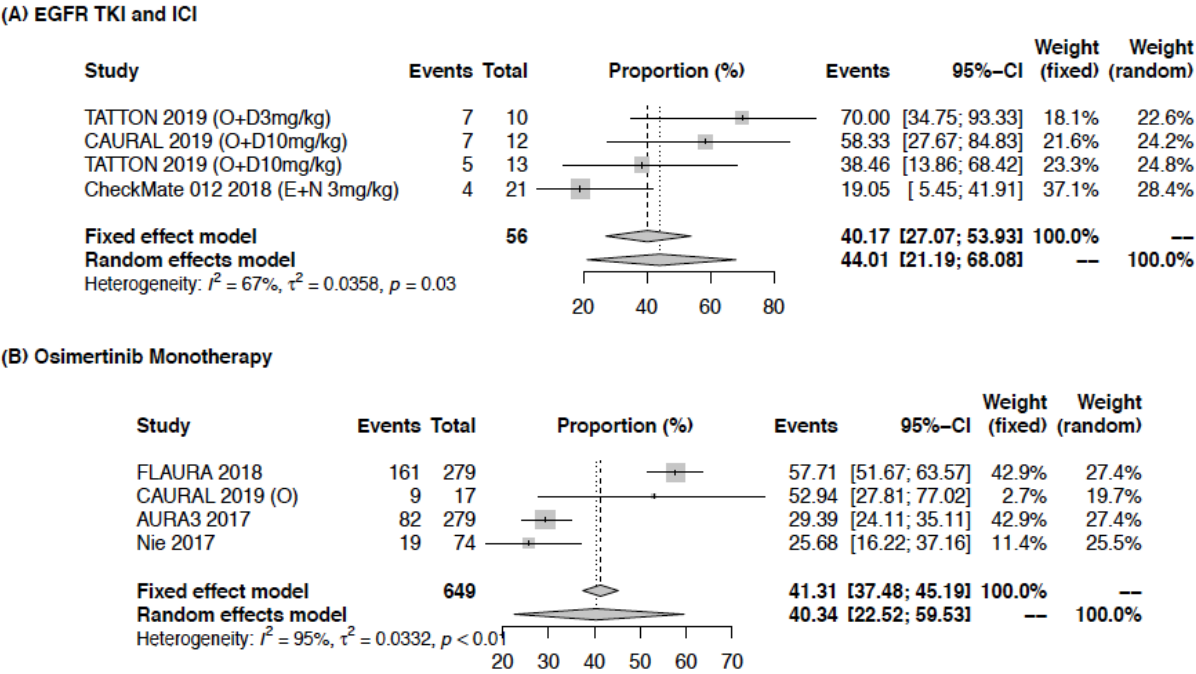

The squares represent the proportions of AE from each study, with smaller squares for larger sample size of the studies. The diamonds represent pooled proportions generated from fixed effect or random effects model. D, durvalumab; E, erlotinib; EGFR, epidermal growth factor receptor; ICI, immune checkpoint inhibitor; N, nivolumab; O, osimertinib; trAEs, treatment-related adverse events; TKI, tyrosine kinase inhibitor.

**Supplementary Figure S5.** Any-grade interstitial lung diseases. (A) Combination therapy with epidermal growth factor receptor tyrosine kinase inhibitor and immune checkpoint inhibitor. (B) Osimertinib monotherapy.

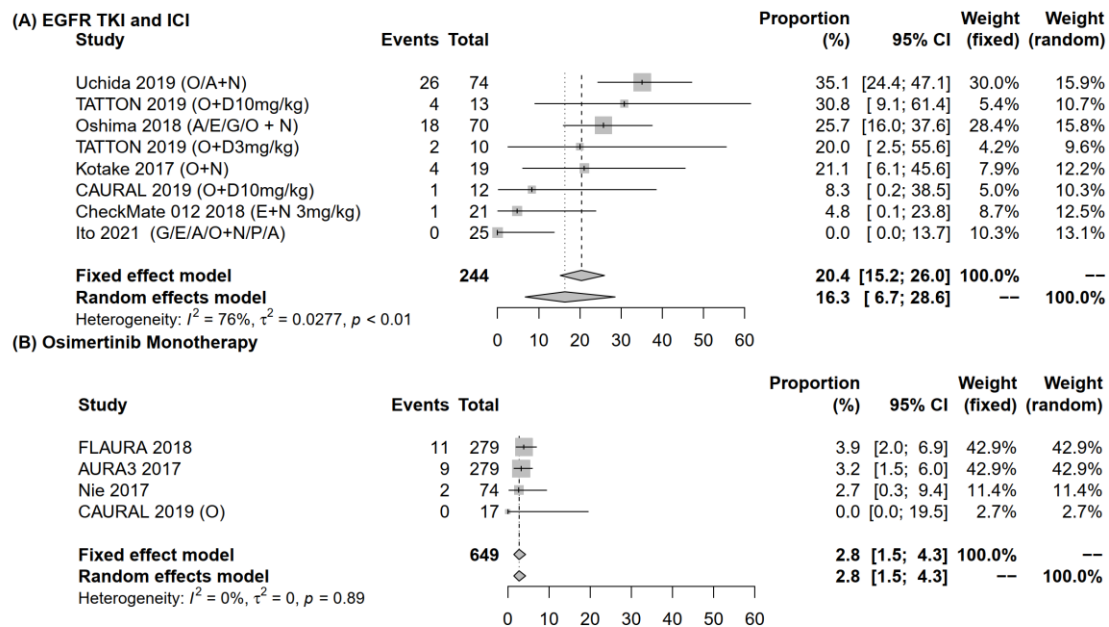

The squares represent the proportions of AE from each study, with smaller squares for larger sample size of the studies. The diamonds represent pooled proportions generated from fixed effect or random effects model. Af, afatinib; At, atezolizumab; D, durvalumab; E, erlotinib; EGFR, epidermal growth factor receptor; G, gefitinib; ICI, immune checkpoint inhibitor; N, nivolumab; O, osimertinib; P, pembrolizumab; trAEs, treatment-related adverse events; TKI, tyrosine kinase inhibitor.

**Supplementary Figure S6.** Grade  $\geq 3$  skin trAEs. (A) Combination therapy with epidermal growth factor receptor tyrosine kinase inhibitor and immune checkpoint inhibitor. (B) Osimertinib monotherapy.

**(A) EGFR-TKI and ICI**

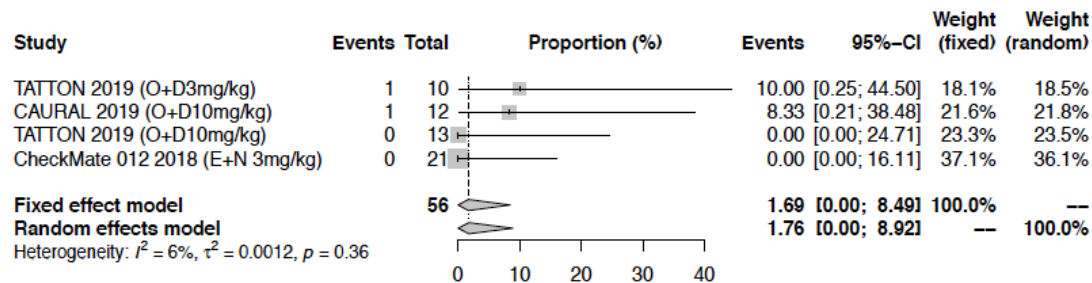

**(B) Osimertinib Monotherapy**

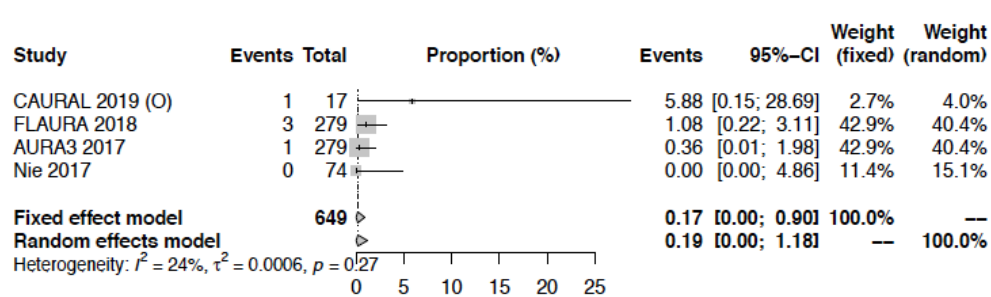

The squares represent the proportions of AE from each study, with smaller squares for larger sample size of the studies. The diamonds represent pooled proportions generated from fixed effect or random effects model. D, durvalumab; E, erlotinib; EGFR, epidermal growth factor receptor; ICI, immune checkpoint inhibitor; N, nivolumab; O, osimertinib; trAEs, treatment-related adverse events; TKI, tyrosine kinase inhibitor.



**Supplementary Figure S7.** Grade  $\geq 3$  gastrointestinal trAEs. (A) Combination therapy with epidermal growth factor receptor tyrosine kinase inhibitor and immune checkpoint inhibitor. (B) Osimertinib monotherapy.

**(A) EGFR-TKI and ICI**

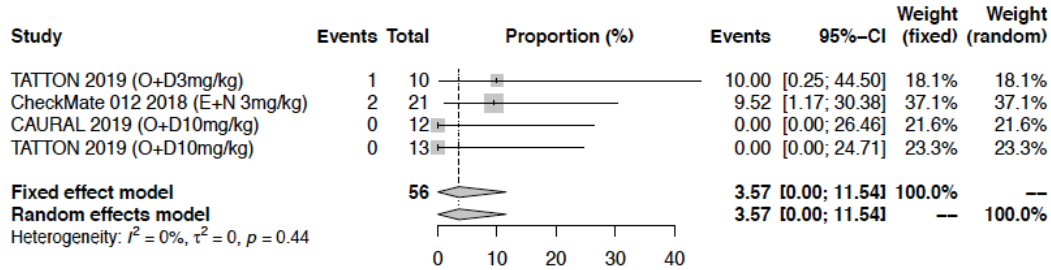

**(B) Osimertinib Monotherapy**

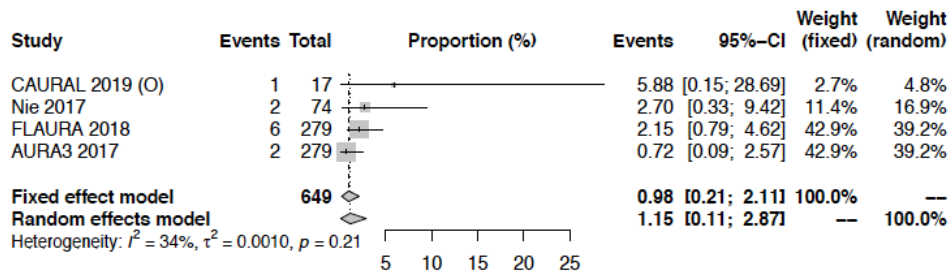

The squares represent the proportions of AE from each study, with smaller squares for larger sample size of the studies. The diamonds represent pooled proportions generated from fixed effect or random effects model. D, durvalumab; E, erlotinib; EGFR, epidermal growth factor receptor; ICI, immune checkpoint inhibitor; N, nivolumab; O, osimertinib; trAEs, treatment-related adverse events; TKI, tyrosine kinase inhibitor.

**Supplementary Figure S8.** Grade  $\geq 3$  interstitial lung disease. (A) Combination therapy with epidermal growth factor receptor tyrosine kinase inhibitor and immune checkpoint inhibitor. (B) Osimertinib monotherapy.

**(A) EGFR-TKI and ICI**

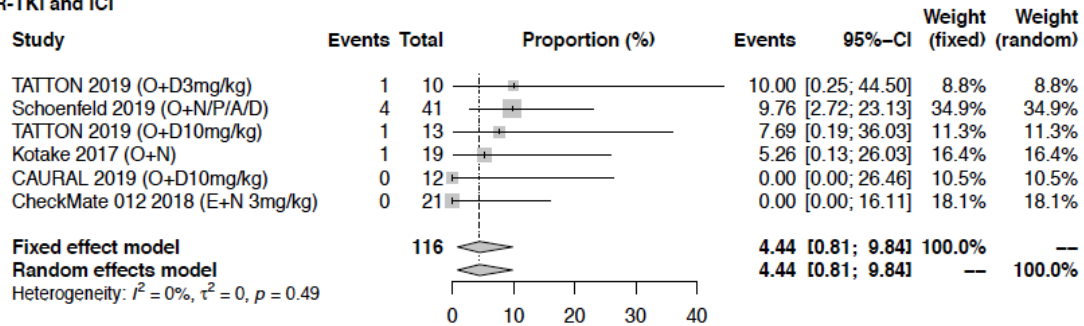

**(B) Osimertinib Monotherapy**

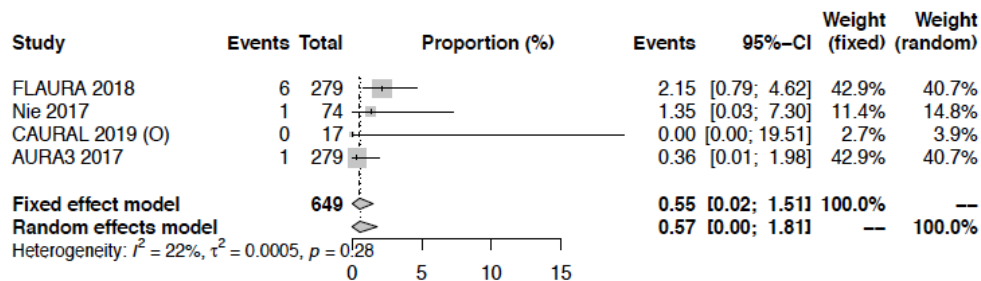

The squares represent the proportions of AE from each study, with smaller squares for larger sample size of the studies. The diamonds represent pooled proportions generated from fixed effect or random effects model. A, atezolizumab; D, durvalumab; E, erlotinib; EGFR, epidermal growth factor receptor; ICI, immune checkpoint inhibitor; N, nivolumab; O, osimertinib; P, pembrolizumab; trAEs, treatment-related adverse events; TKI, tyrosine kinase inhibitor.

**Supplementary Figure S9.** Sensitivity analysis on any-grade interstitial lung disease. (A)

Combination therapy with epidermal growth factor receptor tyrosine kinase inhibitor and immune checkpoint inhibitor. (B) Osimertinib monotherapy, among studies with sample size  $\geq 40$ .

(A) EGFR-TKI and ICI

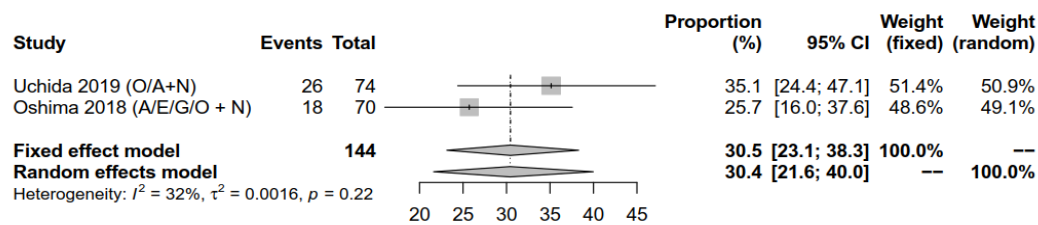

(B) Osimertinib monotherapy

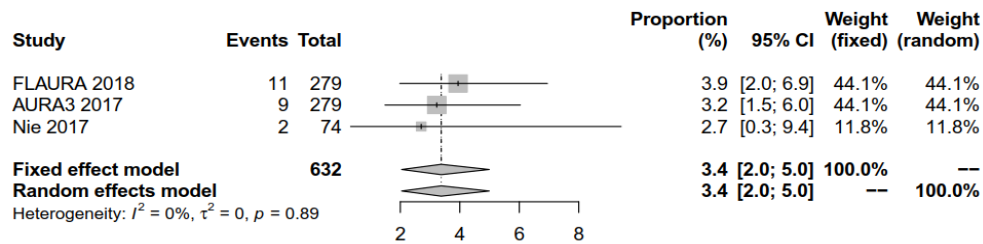

The squares represent the proportions of AE from each study, with smaller squares for larger sample size of the studies. The diamonds represent pooled proportions generated from fixed effect or random effects model. A, afatinib; D, durvalumab; E, erlotinib; EGFR, epidermal growth factor receptor; G, gefitinib; ICI, immune checkpoint inhibitor; N, nivolumab; O, osimertinib; trAEs, treatment-related adverse events; TKI, tyrosine kinase inhibitor.

**Supplementary Figure S10.** Sensitivity analysis on grade  $\geq 3$  interstitial lung disease. (A)

Combination therapy with epidermal growth factor receptor tyrosine kinase inhibitor and immune checkpoint inhibitor. (B) Osimertinib monotherapy, among studies with sample size  $\geq 40$ .

**(A) EGFR-TKI and ICI**

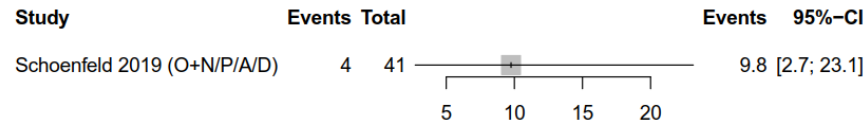

**(B) Osimertinib monotherapy**

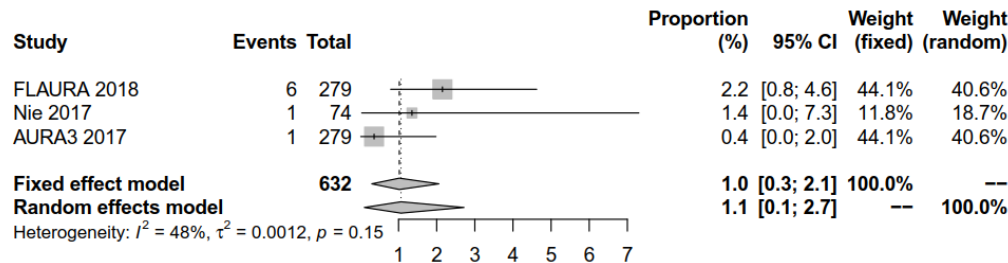

The squares represent the proportions of AE from each study, with smaller squares for larger sample size of the studies. The diamonds represent pooled proportions generated from fixed effect or random effects model. A, atezolizumab; D, durvalumab; EGFR, epidermal growth factor receptor; ICI, immune checkpoint inhibitor; O, osimertinib; P, pembrolizumab; trAEs, treatment-related adverse events; TKI, tyrosine kinase inhibitor.

**Supplementary Table S1.** Summary of osimertinib monotherapy studies.

| Study     | Year | Trial design           | Subcategory | EGFR mutant (%)                               | Treatment line | Age (years) | Sample size (female %) | Dosage and length of osimertinib |
|-----------|------|------------------------|-------------|-----------------------------------------------|----------------|-------------|------------------------|----------------------------------|
| Mok       | 2017 | RCT Phase III          | AURA3       | T790M (100%)                                  | Second         | 20–90       | 279 (62%)              | 80 mg daily until progression    |
| Soria     | 2018 | RCT Phase III          | FLAURA      | Ex19del/L858R (100%) <a href="#"><u>1</u></a> | First          | 26–93       | 279 (64%)              | 80 mg daily until progression    |
| Marinis   | 2017 | Single-arm Phase III b | ASTRIS      | T790M (100%)                                  | Second         | 27–92       | 1,217 (67%)            | 80 mg daily until progression    |
| Nie       | 2017 | RCT Phase III          | NR          | T790M (100%)                                  | Third          | 18–80       | 74 (NR)                | 80 mg daily until progression    |
| Planchard | 2016 | NR                     | NR          | T790M (100%)                                  | ≥Second        | 28–92       | 350 (67%)              | NR                               |
| Hochmair  | 2017 | NR                     | NR          | T790M (100%)                                  | Second         | NR          | 82 (NR)                | 80 mg daily until progression    |

NR, not reported.

**Supplementary Table S2.** Ongoing clinical trials of immune checkpoint inhibitors (ICI) in advanced, metastatic non-small cell lung cancer.

| Clinical trial             | Phase | Setting                                          | Intervention                                                                                                 | Status                     |
|----------------------------|-------|--------------------------------------------------|--------------------------------------------------------------------------------------------------------------|----------------------------|
| NCT02364609                | I     | Chemotherapy or TKI-pretreated                   | Pembrolizumab + afatinib                                                                                     | Completed                  |
| NCT02013219                | Ib    | TKI naive                                        | Atezolizumab + Erlotinib or Alectinib                                                                        | Completed                  |
| NCT02179671                | IIa   | Exclude patients pretreated with ICI             | Gefitinib, osimertinib, or selumetinib + docetaxel or tremelimumab with a sequential switch to durvalumab    | Completed                  |
| NCT04245085/<br>ABC-lung   | II    | TKI-pretreated                                   | Atezolizumab + bevacizumab + carboplatin-paclitaxel/ pemetrexed                                              | Active, recruiting         |
| NCT03647956                | II    | TKI-pretreated                                   | Atezolizumab + bevacizumab + carboplatin +pemetrexed                                                         | Recruitment status unknown |
| NCT04042558                | II    | TKI-pretreated, ALK/ EGFR mutated or ROS1 fusion | Atezolizumab + carboplatin/ cisplatin + pemetrexed +/- bevacizumab                                           | Recruiting                 |
| NCT04147351                | II    | TKI-pretreated, EGFR mutated                     | Atezolizumab + bevacizumab + carboplatin/ cisplatin + pemetrexed                                             | Recruiting                 |
| NCT03513666                | II    | TKI-pretreated                                   | Toripalimab + pemetrexed + carboplatin                                                                       | Active, not recruiting     |
| NCT03944772<br>ORCHARD     | II    | Osimertinib-pretreated, EGFR mutated             | Durvalumab + carboplatin + pemetrexed (module 4), durvalumab + etoposide + carboplatin/ cisplatin (module 7) | Recruiting                 |
| NCT03994393/<br>ILLUMINATE | II    | TKI-pretreated, EGFR mutated                     | Durvalumab and tremelimumab                                                                                  | Recruiting                 |

EGFR, epidermal growth factor receptor; ICI, immune checkpoint inhibitor; TKI, tyrosine kinase inhibitor.

**Supplementary Table S3.** Incidence and nature of trAEs in selected clinical studies.

|                                  | Oxnard (TATTON)                                        |           |                                                         |           | Gettinger                                                 |           | Yang (CAURAL)                           |           |                                                                           |           |
|----------------------------------|--------------------------------------------------------|-----------|---------------------------------------------------------|-----------|-----------------------------------------------------------|-----------|-----------------------------------------|-----------|---------------------------------------------------------------------------|-----------|
|                                  | Osimertinib 80mg daily/ durvalumab 3mg/kg Q2W (n = 10) |           | Osimertinib 80mg daily/ durvalumab 10mg/kg Q2W (n = 13) |           | Nivolumab 3 mg/kg Q2W and erlotinib 150 mg daily (n = 21) |           | Osimertinib (80 mg once daily) (n = 17) |           | Osimertinib (80 mg once daily) with durvalumab (10 mg/kg IV Q2W) (n = 12) |           |
| Treatment related adverse events | Any grade                                              | Grade 3/4 | Any grade                                               | Grade 3/4 | Any grade                                                 | Grade 3/4 | Any grade                               | Grade 3/4 | Any grade                                                                 | Grade 3/4 |
| Total (any grade AE)             | 21%                                                    | NA        | 100%                                                    | NA        | 100%                                                      | NA        | 100%                                    | NA        | 100%                                                                      | NA        |
| Total (grade 3/4 AE)             | NA                                                     | 60%       | NA                                                      | 38.5%     | NA                                                        | 24%       | NA                                      | 53%       | NA                                                                        | 8%        |
| Skin toxicity                    |                                                        |           |                                                         |           |                                                           |           |                                         |           |                                                                           |           |
| Dry skin (grouped terms)         | 30%                                                    | 0         | 30.8%                                                   | 0         | 19%                                                       | 0         | 18%                                     | 0         | 33%                                                                       | 8%        |
| Pruritis                         | NR                                                     | NR        | NR                                                      | NR        | 19%                                                       | 0         | 24%                                     | 0         | 42%                                                                       | 0         |
| Rash (grouped terms)             | 50%                                                    | 10%       | 46%                                                     | 0         | 48%                                                       | 0         | 53%                                     | 0         | 67%                                                                       | 0         |
| Stomatitis                       | NR                                                     | NR        | NR                                                      | NR        | NR                                                        | NR        | 29%                                     | 0         | 0                                                                         | 0         |
| Paronychia (grouped terms)       | NR                                                     | NR        | NR                                                      | NR        | 29%                                                       | 0         | 41%                                     | 0         | 17%                                                                       | 0         |
| Skin fissures                    | NR                                                     | NR        | NR                                                      | NR        | 24%                                                       | 0         | NR                                      | NR        | NR                                                                        | NR        |
| Alopecia                         | NR                                                     | NR        | NR                                                      | NR        | 14%                                                       | NR        | NR                                      | NR        | NR                                                                        | NR        |
| Nail disorder                    | NR                                                     | NR        | NR                                                      | NR        | 14%                                                       | NR        | NR                                      | NR        | NR                                                                        | NR        |
| Hepatotoxicity                   |                                                        |           |                                                         |           |                                                           |           |                                         |           |                                                                           |           |
| ALT increased                    | NR                                                     | NR        | NR                                                      | NR        | 14%                                                       | 5%        | NR                                      | NR        | NR                                                                        | NR        |
| AST increased                    | NR                                                     | NR        | NR                                                      | NR        | 14%                                                       | 10%       | 12%                                     | 0         | 25%                                                                       | 0         |
| ALT/AST increased                | NR                                                     | NR        | NR                                                      | NR        | NR                                                        | NR        | NR                                      | NR        | NR                                                                        | NR        |
| Gastrointestinal toxicity        |                                                        |           |                                                         |           |                                                           |           |                                         |           |                                                                           |           |
| Diarrhoea                        | 30%                                                    | 0         | 23%                                                     | 0         | 19%                                                       | 10%       | 53%                                     | 6%        | 60%                                                                       | 0         |
| Nausea                           | 30%                                                    | 0         | 38%                                                     | 0         | 19%                                                       | 0         | 18%                                     | 0         | 8%                                                                        | 0         |
| Vomiting                         | 70%                                                    | 10%       | 15%                                                     | 0         | 14%                                                       | 0         | NR                                      | NR        | NR                                                                        | NR        |
| Decreased appetite               | 30%                                                    | 10%       | 31%                                                     | 0         | 0                                                         | 0         | 12%                                     | 0         | 50%                                                                       | 0         |

|                                                      |     |     |       |       |     |    |     |     |     |    |
|------------------------------------------------------|-----|-----|-------|-------|-----|----|-----|-----|-----|----|
| Dry mouth                                            | NR  | NR  | NR    | NR    | 14% | 0  | 1%  | 0   | 0   | 0  |
| Colitis                                              | NR  | NR  | NR    | NR    | 0   | 0  | NR  | NR  | NR  | NR |
| Constipation                                         | 30% | 0   | 23.1% | 0     | 0   | 0  | 18% | 0   | 33% | 0  |
| Pulmonary toxicity                                   |     |     |       |       |     |    |     |     |     |    |
| ILD/pneumonitis                                      | 20% | 10% | 31%   | 7.60% | 5%  | 0  | 0   | 0   | 8%  | 0  |
| Pneumonia                                            | NR  | NR  | NR    | NR    | NR  | NR | 18% | 12% | 17% | 0  |
| Upper respiratory toxicity                           | 0   | 0   | 0     | 0     | NR  | NR | 24% | 0   | 33% |    |
| Cough                                                | NR  | NR  | NR    | NR    | NR  | NR | 24% | 0   | 33% | 0  |
| Upper respiratory infection                          | NR  | NR  | NR    | NR    | NR  | NR | 18% | 0   | 8%  | 0  |
| Viral upper respiratory infection                    | NR  | NR  | NR    | NR    | NR  | NR | 24% | 0   | 8%  | 0  |
| Dyspnea                                              | NR  | NR  | NR    | NR    | NR  | NR | 24% | 0   | 0   | 0  |
| Productive cough                                     | NR  | NR  | NR    | NR    | NR  | NR | 18% | 0   | 8%  | 0  |
| Rhinorrhea                                           | NR  | NR  | NR    | NR    | NR  | NR | 18% | 0   | 25% | 0  |
| General disorders and administration site conditions |     |     |       |       |     |    |     |     |     |    |
| Pyrexia                                              | 20% | 0   | 23%   | 7.70% | NR  | NR | NR  | NR  | NR  | NR |
| Fatigue                                              | 30% | 0   | 23.1% | 0     | 29% | 0  | NR  | NR  | NR  | NR |
| Hypersensitivity (infusion) reaction                 | NR  | NR  | NR    | NR    | 10% | 0  | NR  | NR  | NR  | NR |
| Hematological toxicity                               |     |     |       |       |     |    |     |     |     |    |
| Anemia                                               | 40% | 0   | 31%   | 7.60% | NR  | NR | NR  | NR  | NR  | NR |
| Neutropenia                                          | NR  | NR  | NR    | NR    | NR  | NR | 24% | 12% | 0   | 0  |
| Neutrophil count decreased                           | NR  | NR  | NR    | NR    | NR  | NR | 18% | 0   | 0   | 0  |
| Endocrinopathies                                     |     |     |       |       |     |    |     |     |     |    |
| Hypothyroidism                                       | NR  | NR  | NR    | NR    | 14% | 0  | NR  | NR  | NR  | NR |
| Acute thyroiditis                                    | NR  | NR  | NR    | NR    | 15% | 0  | NR  | NR  | NR  | NR |
| Autoimmune thyroiditis                               | NR  | NR  | NR    | NR    | 5%  | 0  | NR  | NR  | NR  | NR |
| Hyperthyroidism                                      | NR  | NR  | NR    | NR    | 5%  | 0  | NR  | NR  | NR  | NR |
| Rheumatological toxicity                             |     |     |       |       |     |    |     |     |     |    |
| Arthralgia                                           | NR  | NR  | NR    | NR    | NR  | NR | 29% | 0   | 17% | 0  |



|                          |    |    |    |    |    |    |     |   |     |   |
|--------------------------|----|----|----|----|----|----|-----|---|-----|---|
| Musculoskeletal toxicity |    |    |    |    |    |    |     |   |     |   |
| Back pain                | NR | NR | NR | NR | NR | NR | 18% | 0 | 25% | 0 |
| Neurological toxicity    |    |    |    |    |    |    |     |   |     |   |
| Hypoesthesia             | NR | NR | NR | NR | NR | NR | 6%  | 0 | 25% | 0 |

NA; not applicable; NR, not reported; Q2W, every 2 weeks; trAEs, treatment-related adverse events.

**Supplementary Table S4.** The Cochrane Collaboration’s tool for assessing risks of bias of randomized-controlled trials.

|                  | Random<br>sequence<br>generation                                                  | Allocation<br>concealment                                                         | Blinding of<br>participants<br>and<br>personnel                                   | Blinding<br>of<br>outcome<br>assessment                                           | Incomplete<br>outcome<br>data                                                       | Selective<br>outcome<br>reporting                                                   | Other<br>sources<br>of bias                                                         |
|------------------|-----------------------------------------------------------------------------------|-----------------------------------------------------------------------------------|-----------------------------------------------------------------------------------|-----------------------------------------------------------------------------------|-------------------------------------------------------------------------------------|-------------------------------------------------------------------------------------|-------------------------------------------------------------------------------------|
| CAURAL<br>(2019) |  |  |  |  |  |  |  |

The light green cells () indicate a low risk of bias. The red cells () indicate a high risk of bias. The yellow cells () indicate an uncertain risk of bias.

**Supplementary Table S5.** Newcastle-Ottawa Scale (NOS) for quality assessment of non-randomized-controlled trials.

|                  | Selection | Comparability | Exposure/outcome | Overall star rating |
|------------------|-----------|---------------|------------------|---------------------|
| TATTON (2019)    | ***       | 0             | 0                | 3                   |
| Gettinger (2018) | **        | 0             | 0                | 2                   |

A star (\*) system was used for allow a semi quantitative assessment of study quality. The NOS ranges from zero to nine stars. We considered high-quality studies as those that achieved seven or more stars, medium-quality studies those with four to six stars, and poor-quality studies those with only one to three stars.
